# Supplementary material for: Angioimmunoblastic T‐cell lymphoma contains multiple clonal T‐cell populations derived from a common TET2 mutant progenitor cell
Source: PubMed Central journal article supplement (PMC7064999; doi:10.1002/path.5376), 2020-01-16
Supplement: PATH-250-346-s001.pdf [file PATH-250-346-s001.pdf]

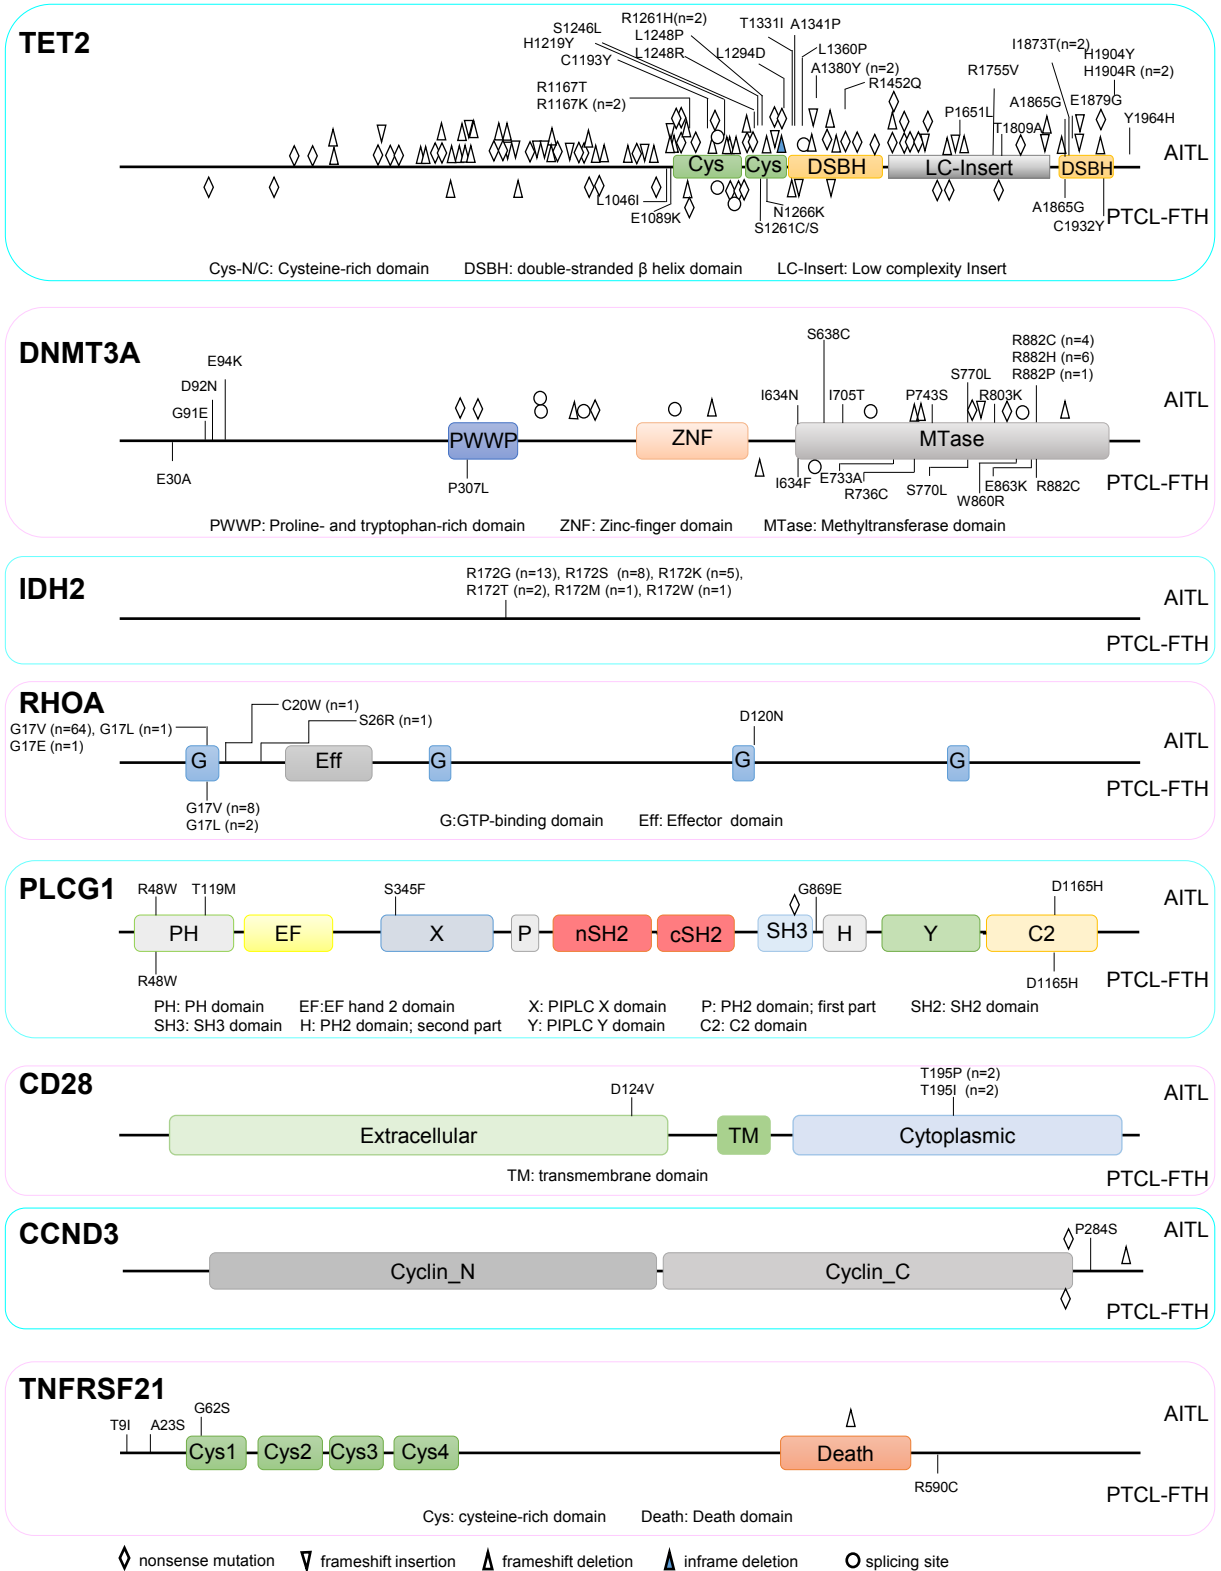

**Figure S1.** Nature and distribution of mutations in *TET2*, *DNMT3A*, *IDH2*, *RHOA*, *PLCG1*, *CCND3* and *TNFRSF21* in AITL and PTCL-TFH.
