# Supplementary material for: Angioimmunoblastic T‐cell lymphoma contains multiple clonal T‐cell populations derived from a common TET2 mutant progenitor cell
Source: PubMed Central journal article supplement (PMC7064999; doi:10.1002/path.5376), 2020-01-16
Supplement: PATH-250-346-s002.pdf [file PATH-250-346-s002.pdf]

**IDH2**  
**AITL019**  
 c.G516C  
 p.R172S

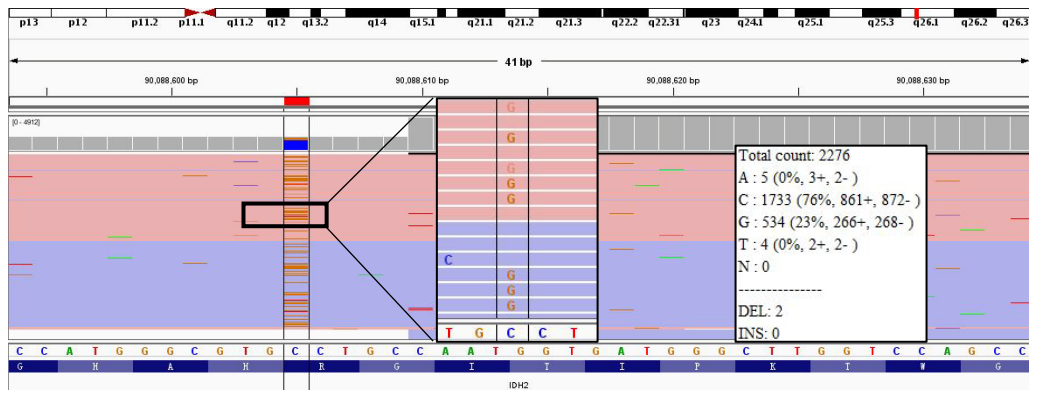

**TET2**  
**AITL065**  
 c.A5636G  
 p.E1879G

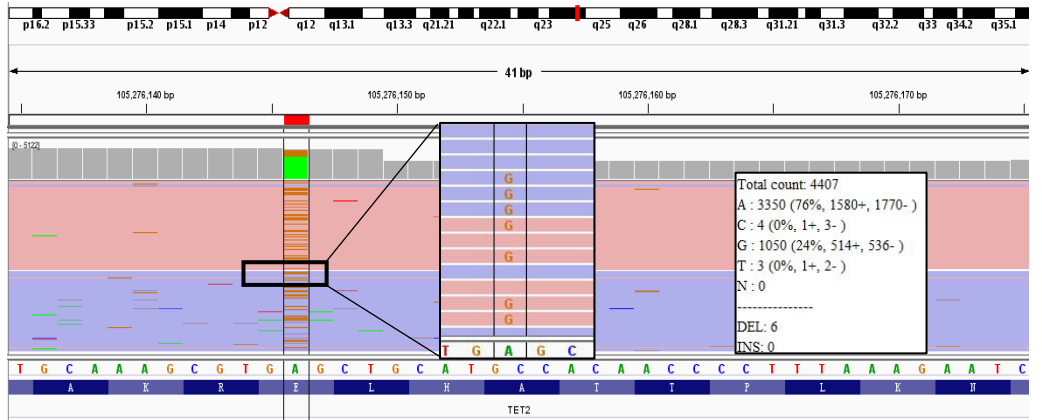

**TET2**  
**AITL063**  
 c.2021\_2028del  
 p.Q674fs

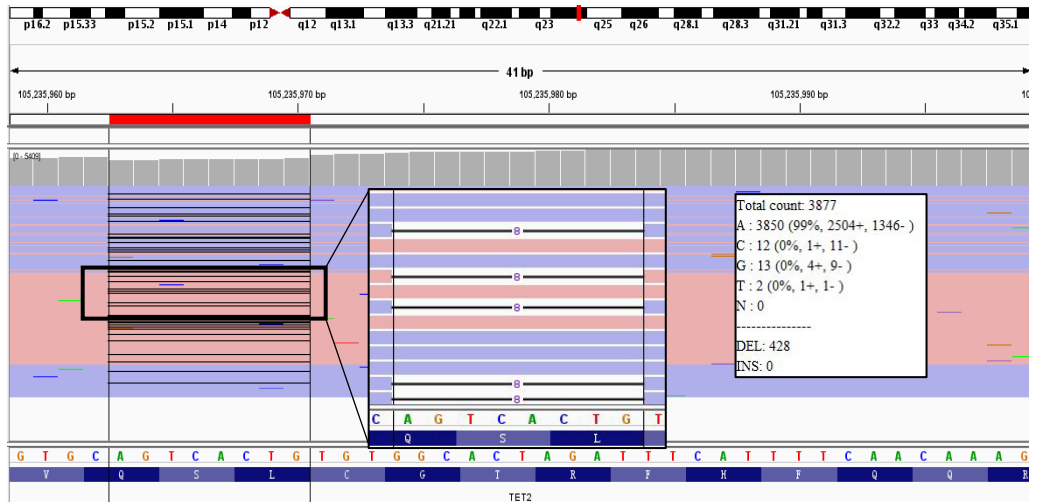

**TET2**  
**AITL043**  
 c.1796delA  
 p.Q599fs

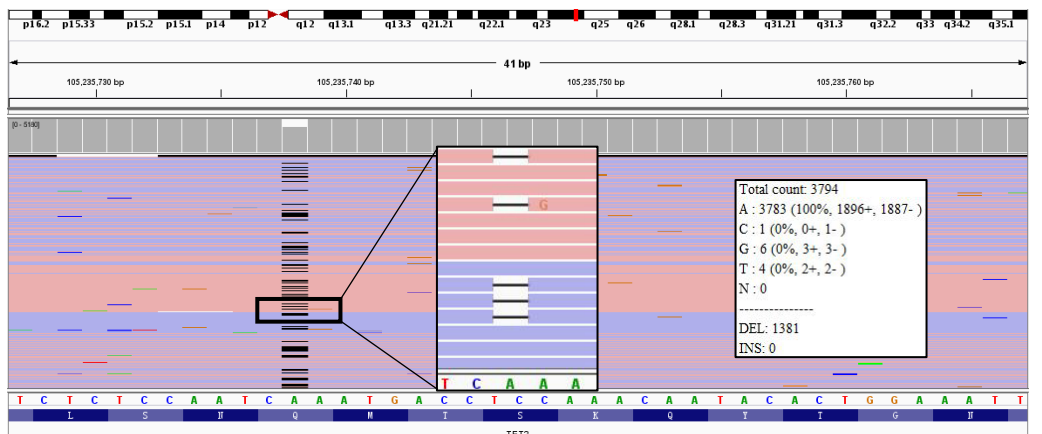

**Figure S2:** Examples of somatic mutations identified by Fluidigm multiplex PCR and Illumina MiSeq sequencing in AITL. . Aligned reads were transformed to a bam file and visualised using IGV software.
