# Supplementary material for: Angioimmunoblastic T‐cell lymphoma contains multiple clonal T‐cell populations derived from a common TET2 mutant progenitor cell
Source: PubMed Central journal article supplement (PMC7064999; doi:10.1002/path.5376), 2020-01-16
Supplement: PATH-250-346-s003.pdf [file PATH-250-346-s003.pdf]

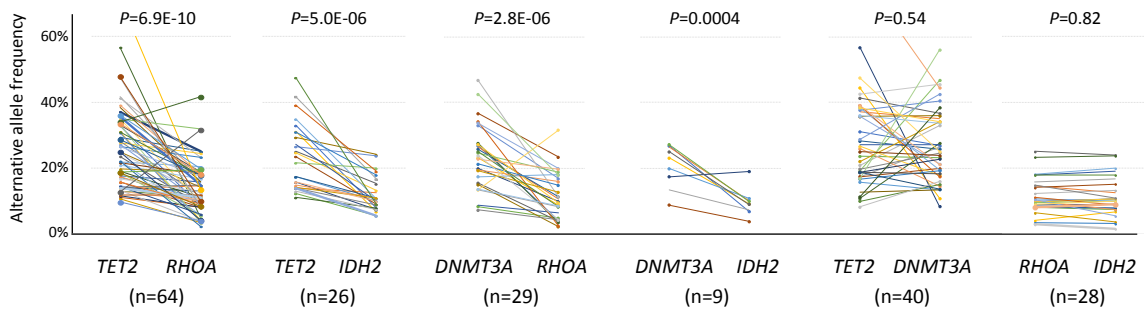

**Figure S3:** Comparison of mutation load among *TET2*, *DNMT3A*, *RHOA* and *IDH2* changes.
