# Supplementary material for: Angioimmunoblastic T‐cell lymphoma contains multiple clonal T‐cell populations derived from a common TET2 mutant progenitor cell
Source: PubMed Central journal article supplement (PMC7064999; doi:10.1002/path.5376), 2020-01-16
Supplement: PATH-250-346-s004.pdf [file PATH-250-346-s004.pdf]

AITL58  
TRB-tube A

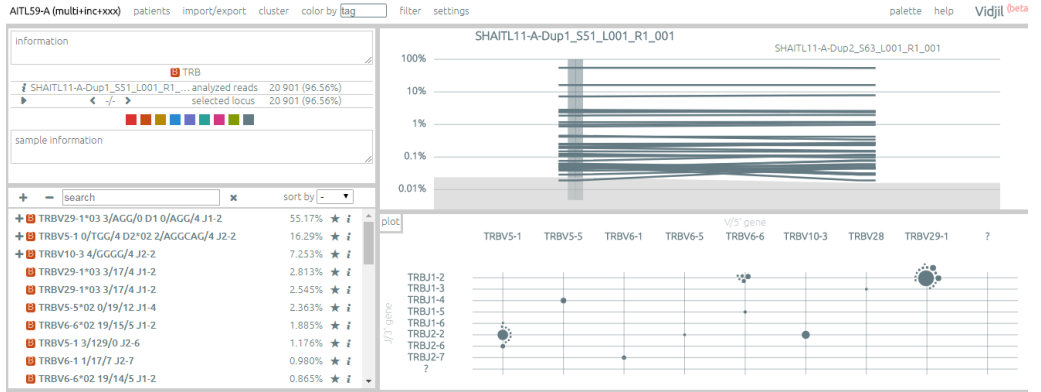

AITL58  
TRB-tube B

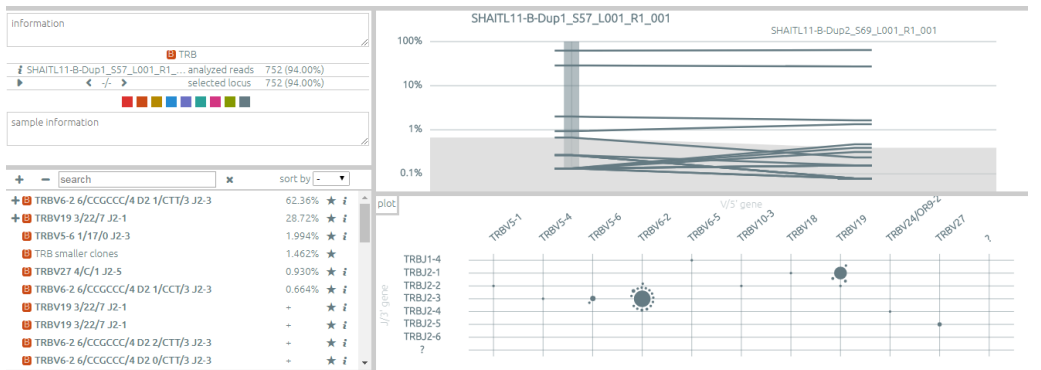

**Figure S4:** Examples of TRB sequencing by BIOMED-2 PCR and Illumina MiSeq sequencing. Sequence data were analysed using Vidjil software.
